# Supplementary material
Source: publisher site journal article supplement (https://www.spandidos-publications.com/7725/downloadSupplementary)
Supplement: Supplementary file 1 [file downloadSupplementary]

Table SI. Reverse transcription - quantitative PCR primers for SYBR - GREEN assays.

| Name  | Forward primer sequence (5'-3') | Reverse primer sequence (5'-3') |
|-------|---------------------------------|---------------------------------|
| DBN1  | AGGAGCTTTCGGGACACTTTG           | GAGCACGTATTTTGGCAGAGC           |
| GAB2  | GTGGGGGATCTGAATGTTTTATG         | GCCCCAGGGTAGAATGAAACG           |
| ANXA1 | GAGGAGGTTGTTTTAGCTCTGC          | AGCAAAGCGTTCCGAAAATCT           |
| GAPDH | CTGGGCTACACTGAGCACC             | AAGTGGTCGTTGAGGGCAATG           |

ANXA1, annexin A1; DBN1, drebrin 1; GAB2, Grb2-associated binding protein 2.

Table SII. Antibodies used for western blotting.

| Name                       | Cat. no.  | Supplier                        | Dilution |
|----------------------------|-----------|---------------------------------|----------|
| DBN1                       | AB60932   | Abcam                           | 1:400    |
| GAB2                       | AB108423  | Abcam                           | 1:1,000  |
| ANXA1                      | AB214486  | Abcam                           | 1:2,000  |
| AKT                        | 4691T     | Cell Signaling Technology, Inc. | 1:1,000  |
| p-AKT (S473)               | 4060T     | Cell Signaling Technology, Inc. | 1:2,000  |
| ERK1/2                     | 4695T     | Cell Signaling Technology, Inc. | 1:1,000  |
| p-ERK1/2 (T202/Y204)       | 4370T     | Cell Signaling Technology, Inc. | 1:2,000  |
| GAPDH                      | AC033     | ABclonal Biotech Co., Ltd.      | 1:10,000 |
| Actin                      | AC038     | ABclonal Biotech Co., Ltd.      | 1:10,000 |
| HRP-linked anti-mouse IgG  | SA0000I-1 | Proteintech Group, Inc.         | 1:5,000  |
| HRP-linked anti-rabbit IgG | SA0000I-2 | Proteintech Group, Inc.         | 1:5,000  |

ANXA1, annexin A1; DBN1, drebrin 1; GAB2, Grb2-associated binding protein 2; p-, phosphorylated.

Table SIII. Lentiviral plasmids.

| Name     | Sequence (5'-3')      |
|----------|-----------------------|
| shDBN1-1 | GTGTCGACGTGATCGTGAACG |
| shDBN1-2 | CTGTGGAAATGAAGCGGATTA |
| shNC     | CAACAAGATGAAGAGCACCAA |

DBN1, drebrin 1; NC, negative control; sh, short hairpin RNA.

Table SIV. DBN1-WT and DBN1-MUT plasmid sequences.

| Name     | Sequence (5'-3')      |
|----------|-----------------------|
| DBN1-WT  | UUUUUUUUUUGGAAAGCACAA |
| DBN1-MUT | UUUUUUUUUUGGAUUCGUGUA |

DBN1, drebrin 1; MUT, mutant; WT, wild-type.
